# Supplementary material
Source: PubMed Central journal article supplement (PMC8466723)
Supplement: NIHMS1741786-supplement-Supp_Materials.pdf [file NIHMS1741786-supplement-Supp_Materials.pdf]

# NECo: A node embedding algorithm for multiplex heterogeneous networks: Supplementary Data

Cagatay Dursun  
Department of Biomedical Engineering  
Marquette University – Medical  
College of Wisconsin  
Milwaukee WI USA  
cdursun@mcw.edu

Jennifer R. Smith, G. Thomas Hayman, Anne E. Kwitek  
*Rat Genome Database*  
*Department of Biomedical Engineering*  
*Department of Physiology*  
*Medical College of Wisconsin*  
Milwaukee WI USA

Serdar Bozdog  
Department of Computer Science  
Marquette University  
Milwaukee WI USA  
serdar.bozdog@mu.edu

**Supplementary Table 1.** Hypertension Disease Related Mammalian Phenotype Ontology Terms

| <b>TERM ID</b> | <b>TERM</b>                                                       |
|----------------|-------------------------------------------------------------------|
| MP:0000230     | abnormal systemic arterial blood pressure                         |
| MP:0000231     | hypertension                                                      |
| MP:0002842     | increased systemic arterial blood pressure                        |
| MP:0003034     | increased pulmonary vascular resistance                           |
| MP:0003328     | portal hypertension                                               |
| MP:0003349     | abnormal circulating renin level                                  |
| MP:0003352     | increased circulating renin level                                 |
| MP:0003547     | abnormal pulmonary pressure                                       |
| MP:0003548     | pulmonary hypertension                                            |
| MP:0003819     | increased left ventricle diastolic pressure                       |
| MP:0003820     | increased left ventricle systolic pressure                        |
| MP:0003823     | increased left ventricle developed pressure                       |
| MP:0004012     | increased pulmonary artery pressure                               |
| MP:0004118     | abnormal baroreceptor morphology                                  |
| MP:0004164     | abnormal neurohypophysis morphology                               |
| MP:0004167     | abnormal cingulate gyrus morphology                               |
| MP:0004184     | abnormal baroreceptor physiology                                  |
| MP:0004216     | salt-resistant hypertension                                       |
| MP:0004217     | salt-sensitive hypertension                                       |
| MP:0004875     | increased mean systemic arterial blood pressure                   |
| MP:0004878     | increased systemic vascular resistance                            |
| MP:0004879     | decreased systemic vascular resistance                            |
| MP:0005522     | increased circulating atrial natriuretic factor                   |
| MP:0005529     | abnormal renal vascular resistance                                |
| MP:0005530     | decreased renal vascular resistance                               |
| MP:0005531     | increased renal vascular resistance                               |
| MP:0005532     | abnormal vascular resistance                                      |
| MP:0005611     | decreased circulating antidiuretic hormone level                  |
| MP:0006143     | increased systemic arterial diastolic blood pressure              |
| MP:0006144     | increased systemic arterial systolic blood pressure               |
| MP:0006265     | increased pulse pressure                                          |
| MP:0006373     | abnormal circulating angiotensinogen level                        |
| MP:0006375     | increased circulating angiotensinogen level                       |
| MP:0008776     | increased right ventricle peak pressure                           |
| MP:0008777     | increased right ventricle diastolic pressure                      |
| MP:0010695     | abnormal blood pressure regulation                                |
| MP:0010697     | abnormal systemic arterial blood pressure regulation              |
| MP:0010758     | increased right ventricle systolic pressure                       |
| MP:0011022     | abnormal circadian regulation of systemic arterial blood pressure |
| MP:0011312     | abnormal kidney afferent arteriole morphology                     |

|            |                                          |
|------------|------------------------------------------|
| MP:0012007 | abnormal chloride level                  |
| MP:0012045 | increased susceptibility to hypertension |
| MP:0012046 | decreased susceptibility to hypertension |

---

**Supplementary Table 2.** Hypertension Disease Related Disease Ontology Terms

| <b>TERM ID</b> | <b>TERM</b>                             |
|----------------|-----------------------------------------|
| DOID:1073      | renal hypertension                      |
| DOID:10763     | hypertension                            |
| DOID:10824     | malignant hypertension                  |
| DOID:6432      | pulmonary hypertension                  |
| DOID:9003234   | Hypertensive Nephropathy                |
| DOID:9006166   | Pulmonary Hypertension, Hypoxia-Induced |

**Supplementary Table 3.** Hypertension disease related genes having experimental annotations at Rat Genome Database. The genes having only expression based experimental evidence codes are excluded. IDA: Inferred from direct assay; IAGP: Inferred from association of genotype from phenotype; IMP: Inferred from mutant phenotype.

| <b>RGD ID</b> | <b>Gene Symbol</b> | <b>Disease Ontology Term</b> | <b>Evidence</b> |
|---------------|--------------------|------------------------------|-----------------|
| 2031          | Ada                | hypertension                 | IDA             |
| 2041          | Add1               | hypertension                 | IAGP            |
| 2041          | Add1               | hypertension                 | IDA             |
| 2042          | Add2               | hypertension                 | IDA             |
| 2043          | Add3               | hypertension                 | IDA             |
| 2048          | Adora1             | hypertension                 | IDA             |
| 2048          | Adora1             | hypertension                 | IMP             |
| 2057          | Adra2b             | hypertension                 | IMP             |
| 2059          | Adrb1              | renovascular hypertension    | IDA             |
| 2059          | Adrb1              | renovascular hypertension    | IMP             |
| 2069          | Agt                | hypertension                 | IDA             |
| 2069          | Agt                | hypertension                 | IMP             |
| 2069          | Agt                | pulmonary hypertension       | IDA             |
| 2070          | Agtr1a             | Hypertensive Nephropathy     | IMP             |
| 2070          | Agtr1a             | hypertension                 | IMP             |
| 2070          | Agtr1a             | renovascular hypertension    | IMP             |
| 2072          | Agtr2              | hypertension                 | IMP             |
| 2072          | Agtr2              | renovascular hypertension    | IDA             |
| 2072          | Agtr2              | renovascular hypertension    | IMP             |
| 2081          | Akt1               | hypertension                 | IDA             |
| 2096          | Alox5              | hypertension                 | IDA             |
| 2096          | Alox5              | pulmonary hypertension       | IDA             |
| 2096          | Alox5              | pulmonary hypertension       | IMP             |
| 2097          | Alox5ap            | pulmonary hypertension       | IMP             |
| 2147          | Ar                 | hypertension                 | IDA             |
| 2147          | Ar                 | hypertension                 | IMP             |
| 2150          | Arg1               | hypertension                 | IMP             |
| 2151          | Arg2               | hypertension                 | IMP             |
| 2167          | Atp1a1             | hypertension                 | IAGP            |
| 2186          | Avpr2              | hypertension                 | IDA             |
| 2200          | Bcl2l1             | pulmonary hypertension       | IDA             |
| 2201          | Bdkrb2             | pulmonary hypertension       | IDA             |
| 2232          | C3                 | pre-eclampsia                | IDA             |
| 2275          | Casp3              | hypertension                 | IDA             |
| 2279          | Cat                | Renoprival Hypertension      | IMP             |
| 2369          | Cnr1               | hypertension                 | IMP             |
| 2379          | Comt               | hypertension                 | IDA             |
| 2453          | Cyp11b1            | hypertension                 | IAGP            |
| 2454          | Cyp11b2            | hypertension                 | IMP             |

|      |        |                                         |      |
|------|--------|-----------------------------------------|------|
| 2493 | Ace    | Hypertensive Nephrosclerosis            | IMP  |
| 2493 | Ace    | hypertension                            | IDA  |
| 2493 | Ace    | hypertension                            | IMP  |
| 2493 | Ace    | renovascular hypertension               | IDA  |
| 2503 | Nqo1   | hypertension                            | IDA  |
| 2521 | Drd3   | hypertension                            | IDA  |
| 2535 | Ednra  | hypertension                            | IDA  |
| 2535 | Ednra  | pulmonary hypertension                  | IDA  |
| 2535 | Ednra  | pulmonary hypertension                  | IMP  |
| 2536 | Ednrb  | hypertension                            | IMP  |
| 2536 | Ednrb  | pulmonary hypertension                  | IDA  |
| 2536 | Ednrb  | pulmonary hypertension                  | IMP  |
| 2582 | Esr2   | hypertension                            | IMP  |
| 2582 | Esr2   | pulmonary hypertension                  | IDA  |
| 2586 | F2r    | hypertension                            | IDA  |
| 2609 | Fgf2   | pulmonary hypertension                  | IMP  |
| 2624 | Fn1    | renovascular hypertension               | IDA  |
| 2645 | G6pd   | Pulmonary Hypertension, Hypoxia-Induced | IMP  |
| 2692 | Gja5   | hypertension                            | IDA  |
| 2703 | Glp1r  | hypertension                            | IDA  |
| 2729 | Gpx1   | hypertension                            | IDA  |
| 2741 | Nr3c1  | hypertension                            | IMP  |
| 2802 | Hmgb1  | pulmonary hypertension                  | IMP  |
| 2803 | Hmgcr  | pulmonary hypertension                  | IMP  |
| 2806 | Hmox1  | hypertension                            | IDA  |
| 2806 | Hmox1  | pulmonary hypertension                  | IDA  |
| 2806 | Hmox1  | renal hypertension                      | IDA  |
| 2857 | Icam1  | pre-eclampsia                           | IMP  |
| 2858 | Id1    | pulmonary hypertension                  | IDA  |
| 2868 | Igf1   | hypertension                            | LAGP |
| 2891 | Il1b   | hypertension                            | IDA  |
| 2901 | Il6    | eclampsia                               | IDA  |
| 2901 | Il6    | pulmonary hypertension                  | IDA  |
| 2916 | Ins2   | hypertension                            | IDA  |
| 2943 | Jun    | hypertension                            | IDA  |
| 2953 | Kcna5  | pulmonary hypertension                  | IDA  |
| 2960 | Kcnj8  | hypertension                            | IDA  |
| 2961 | Kcnmb1 | hypertension                            | IDA  |
| 3000 | Lep    | hypertension                            | IDA  |
| 3015 | Lox    | hypertension                            | IDA  |
| 3030 | Smad1  | pulmonary hypertension                  | IDA  |
| 3049 | Mas1   | hypertension                            | IMP  |
| 3098 | Mme    | hypertension                            | IMP  |

|      |          |                           |      |
|------|----------|---------------------------|------|
| 3100 | Mmp7     | hypertension              | IMP  |
| 3130 | Myc      | pulmonary hypertension    | IDA  |
| 3175 | Klk1b3   | hypertension              | LAGP |
| 3177 | Ngfr     | hypertension              | LAGP |
| 3184 | Nos1     | hypertension              | IDA  |
| 3184 | Nos1     | hypertension              | IMP  |
| 3185 | Nos2     | renal hypertension        | IMP  |
| 3186 | Nos3     | hypertension              | IDA  |
| 3186 | Nos3     | pulmonary hypertension    | IDA  |
| 3186 | Nos3     | pulmonary hypertension    | IMP  |
| 3186 | Nos3     | renal hypertension        | IDA  |
| 3193 | Nppa     | pulmonary hypertension    | IDA  |
| 3194 | Nppb     | hypertension              | IDA  |
| 3195 | Npr1     | hypertension              | LAGP |
| 3197 | Npy      | hypertension              | IMP  |
| 3198 | Npy1r    | hypertension              | IMP  |
| 3238 | Oxt      | hypertension              | IMP  |
| 3249 | Serpine1 | hypertension              | IDA  |
| 3249 | Serpine1 | pulmonary hypertension    | IDA  |
| 3326 | Serpina1 | pulmonary hypertension    | IDA  |
| 3329 | Pik3r1   | hypertension              | IMP  |
| 3346 | Plcd1    | hypertension              | IDA  |
| 3369 | Ppara    | Hypertensive Nephropathy  | IDA  |
| 3369 | Ppara    | hypertension              | IMP  |
| 3371 | Pparg    | hypertension              | IDA  |
| 3371 | Pparg    | hypertension              | IMP  |
| 3395 | Prkca    | hypertension              | LAGP |
| 3396 | Prkcb    | hypertension              | IDA  |
| 3438 | Ptgis    | pulmonary hypertension    | IDA  |
| 3438 | Ptgis    | pulmonary hypertension    | IMP  |
| 3439 | Ptgs1    | renovascular hypertension | IMP  |
| 3443 | Ptk2     | hypertension              | LAGP |
| 3454 | Ptprj    | hypertension              | LAGP |
| 3554 | Ren      | hypertension              | IDA  |
| 3555 | Resp18   | hypertension              | IMP  |
| 3645 | Ccl2     | hypertension              | IDA  |
| 3714 | Slc6a4   | pulmonary hypertension    | IDA  |
| 3714 | Slc6a4   | pulmonary hypertension    | IMP  |
| 3720 | Slc9a3   | hypertension              | IDA  |
| 3732 | Sod2     | hypertension              | IDA  |
| 3733 | Sod3     | hypertension              | IDA  |
| 3752 | Spp1     | renovascular hypertension | IDA  |
| 3807 | Tac1     | pulmonary hypertension    | IMP  |

|        |         |                                 |      |
|--------|---------|---------------------------------|------|
| 3810   | Tacr3   | hypertension                    | IDA  |
| 3811   | Tacr1   | pulmonary hypertension          | IMP  |
| 3812   | Tacr2   | pulmonary hypertension          | IMP  |
| 3826   | Tbxas1  | hypertension                    | IDA  |
| 3852   | Tgfbr1  | pulmonary hypertension          | IMP  |
| 3876   | Tnf     | Hypertension, Pregnancy-Induced | IMP  |
| 3876   | Tnf     | hypertension                    | IAGP |
| 3876   | Tnf     | hypertension                    | IMP  |
| 3903   | Trh     | hypertension                    | IDA  |
| 3904   | Trhr    | hypertension                    | IDA  |
| 3930   | Uts2    | hypertension                    | IDA  |
| 3932   | Ucp2    | hypertension                    | IDA  |
| 61276  | Crhr1   | hypertension                    | IDA  |
| 61925  | Prkce   | hypertension                    | IAGP |
| 61927  | Pecam1  | pulmonary hypertension          | IDA  |
| 62043  | Xdh     | hypertension                    | IDA  |
| 62086  | Acsm3   | hypertension                    | IAGP |
| 67383  | Prkcd   | hypertension                    | IAGP |
| 68371  | Mtor    | hypertension                    | IDA  |
| 68371  | Mtor    | pulmonary hypertension          | IMP  |
| 68407  | Lrp2    | hypertension                    | IDA  |
| 68411  | Sh2b3   | hypertension                    | IMP  |
| 69305  | Nr2f2   | hypertension                    | IMP  |
| 70499  | Birc5   | pulmonary hypertension          | IMP  |
| 71061  | Kynu    | hypertension                    | IAGP |
| 619754 | Smpd3   | pulmonary hypertension          | IMP  |
| 619790 | Rag1    | Hypertensive Nephropathy        | IMP  |
| 619790 | Rag1    | hypertension                    | IMP  |
| 619796 | Cysltr1 | pulmonary hypertension          | IMP  |
| 619806 | Mtpn    | hypertension                    | IDA  |
| 619830 | Cd40    | pulmonary hypertension          | IMP  |
| 619866 | Dynll1  | hypertension                    | IMP  |
| 619993 | Atp5f1a | pulmonary hypertension          | IDA  |
| 620007 | Cyp2j4  | pre-eclampsia                   | IMP  |
| 620209 | Cxcl10  | renovascular hypertension       | IDA  |
| 620217 | Sle5a2  | hypertension                    | IDA  |
| 620243 | Gnai2   | hypertension                    | IMP  |
| 620293 | Ece1    | hypertension                    | IDA  |
| 620293 | Ece1    | pulmonary hypertension          | IMP  |
| 620322 | Cldn16  | hypertension                    | IDA  |
| 620349 | Ptgs2   | hypertension                    | IAGP |
| 620349 | Ptgs2   | pulmonary hypertension          | IMP  |
| 620396 | Kl      | hypertension                    | IDA  |

|         |          |                           |      |
|---------|----------|---------------------------|------|
| 620401  | Bdkrb1   | hypertension              | IMP  |
| 620446  | Shc1     | Hypertensive Nephropathy  | IMP  |
| 620573  | Cyba     | hypertension              | IDA  |
| 620573  | Cyba     | pulmonary hypertension    | IDA  |
| 620600  | Nox4     | hypertension              | IMP  |
| 620630  | Hrh3     | hypertension              | IDA  |
| 620713  | Fgfr1    | pulmonary hypertension    | IMP  |
| 620732  | Ephx2    | hypertension              | IDA  |
| 620732  | Ephx2    | hypertension              | IMP  |
| 620732  | Ephx2    | pulmonary hypertension    | IMP  |
| 620795  | Src      | hypertension              | IDA  |
| 620809  | Slc12a2  | hypertension              | IDA  |
| 620948  | Abat     | hypertension              | IDA  |
| 620995  | Pde5a    | pre-eclampsia             | IMP  |
| 620995  | Pde5a    | pulmonary hypertension    | IMP  |
| 621057  | Tnc      | pulmonary hypertension    | IDA  |
| 621137  | Rnpep    | hypertension              | IMP  |
| 621159  | Il1rn    | hypertension              | IDA  |
| 621163  | Mif      | hypertension              | IDA  |
| 621316  | Mmp2     | renal hypertension        | IDA  |
| 621320  | Mmp9     | pulmonary hypertension    | IDA  |
| 621320  | Mmp9     | renal hypertension        | IDA  |
| 621376  | Atp5pf   | pulmonary hypertension    | IMP  |
| 621503  | Kcnq1    | hypertension              | LAGP |
| 621506  | Mapk8    | hypertension              | IDA  |
| 621528  | Cxcr3    | renovascular hypertension | IDA  |
| 621647  | Vip      | pulmonary hypertension    | IDA  |
| 621862  | Atf2     | hypertension              | IDA  |
| 621884  | Uts2r    | hypertension              | IDA  |
| 631375  | Egln1    | hypertension              | IMP  |
| 631401  | Wnk4     | hypertension              | LAGP |
| 708418  | Cd40lg   | pre-eclampsia             | IMP  |
| 1306950 | Nisch    | hypertension              | IMP  |
| 1307690 | Nfatc2   | pulmonary hypertension    | IMP  |
| 1307917 | Mmp1     | pulmonary hypertension    | IDA  |
| 1310046 | Adamts16 | hypertension              | IMP  |
| 1310740 | Lipg     | hypertension              | IDA  |
| 1559787 | Srf      | hypertension              | IDA  |
| 1560646 | Myo6     | hypertension              | IDA  |
| 1563603 | Rad51    | hypertension              | IDA  |
| 1566119 | H2ax     | hypertension              | IDA  |
| 1593188 | Eng      | pre-eclampsia             | IDA  |

---



**Supplementary Table 4.** Mean AUC values with standard deviations are given for different combinations of multiplex and aggregated networks. The results are for 10 runs for each combination. PPI: protein-protein interaction, PWY: pathway, EXPR: co-expression, DO: Disease Ontology, MPO: Mammalian Phenotype Ontology, QP: Quantitative Phenotype Measurements

| Rank | Networks Used               |                          | Mean AUC | Std. Dev. |
|------|-----------------------------|--------------------------|----------|-----------|
|      | Gene                        | Phenotype                |          |           |
| 1    | Multiplex (PPI, PWY, EXPR)  | Aggregated (MPO, QP)     | 94.97    | 0.24      |
| 2    | Multiplex (PPI, PWY, EXPR)  | Aggregated (MPO, DO)     | 94.92    | 0.25      |
| 3    | Multiplex (PPI, PWY, EXPR)  | Aggregated (MPO, DO, QP) | 94.89    | 0.27      |
| 4    | Multiplex (PPI, PWY, EXPR)  | Multiplex (MPO, DO)      | 94.87    | 0.30      |
| 5    | Multiplex (PPI, PWY, EXPR)  | Multiplex (MPO, QP)      | 94.87    | 0.35      |
| 6    | Multiplex (PPI, PWY, EXPR)  | Multiplex (MPO, DO, QP)  | 94.85    | 0.29      |
| 7    | Multiplex (PPI, PWY, EXPR)  | Multiplex (DO, QP)       | 94.81    | 0.29      |
| 8    | Multiplex (PPI, PWY, EXPR)  | Aggregated (DO, QP)      | 94.52    | 0.12      |
| 9    | Multiplex (PPI, EXPR)       | Multiplex (MPO, DO, QP)  | 94.42    | 0.30      |
| 10   | Multiplex (PPI, PWY)        | Multiplex (MPO, DO, QP)  | 93.99    | 0.44      |
| 11   | Aggregated (PPI, PWY, EXPR) | Multiplex (MPO, DO, QP)  | 93.51    | 0.39      |
| 12   | Aggregated (PPI, PWY, EXPR) | Aggregated (MPO, DO, QP) | 93.29    | 0.34      |
| 13   | Multiplex (PWY, EXPR)       | Multiplex (MPO, DO, QP)  | 92.69    | 0.38      |

**Supplementary Table 5.** Novel gene predictions of NECo sorted by prediction probability.

| <b>RGD ID</b> | <b>Symbol</b> | <b>Evidence</b>     |
|---------------|---------------|---------------------|
| 3277          | Pdc           | [2, 10, 26]         |
| 3548          | Rcn2          | [19]                |
| 619749        | Gna11         | [27]                |
| 621450        | Kcnk6         | [21, 28]            |
| 61835         | Fkbp1b        | [6, 22, 40]         |
| 62051         | Pla2g5        | [4, 23, 38]         |
| 61977         | Ckmt2         | -                   |
| 620866        | F2rl1         | [20, 43]            |
| 3434          | Ptger1        | [1, 24, 32]         |
| 61935         | Pla2g10       | -                   |
| 2051          | Adora3        | [11, 44]            |
| 620770        | Gnaq          | [39, 43]            |
| 1563131       | Wnk3          | [3, 12]             |
| 3026          | Lyz2          | [17, 29, 30, 37]    |
| 621767        | Agxt2         | [5, 13]             |
| 2603          | Fga           | [16, 31, 34, 35]    |
| 620287        | Mybph         | [8]                 |
| 620598        | Nox1          | [9, 18, 25, 33, 41] |
| 620020        | Ptger2        | [14, 36, 42]        |
| 619974        | Asl           | [7, 15]             |

## REFERENCES

- [1] Bartlett, C.S. et al. 2012. EP1 disruption attenuates end-organ damage in a mouse model of hypertension. *Hypertension (Dallas, Tex.: 1979)*. 60, 5 (Nov. 2012), 1184–1191. DOI:<https://doi.org/10.1161/HYPERTENSIONAHA.112.199026>.
- [2] Beetz, N. et al. 2009. Phosducin influences sympathetic activity and prevents stress-induced hypertension in humans and mice. *The Journal of Clinical Investigation*. 119, 12 (Dec. 2009), 3597–3612. DOI:<https://doi.org/10.1172/JCI38433>.
- [3] Bhuiyan, M.I.H. et al. 2017. WNK-Cab39-NKCC1 signaling increases the susceptibility to ischemic brain damage in hypertensive rats. *Journal of Cerebral Blood Flow and Metabolism: Official Journal of the International Society of Cerebral Blood Flow and Metabolism*. 37, 8 (Aug. 2017), 2780–2794. DOI:<https://doi.org/10.1177/0271678X16675368>.
- [4] Brien, M. et al. 2017. Increased placental phospholipase A2 gene expression and free F2-isoprostane levels in response to oxidative stress in preeclampsia. *Placenta*. 55, (Jul. 2017), 54–62. DOI:<https://doi.org/10.1016/j.placenta.2017.05.004>.
- [5] Caplin, B. et al. 2012. Alanine-glyoxylate aminotransferase-2 metabolizes endogenous methylarginines, regulates NO, and controls blood pressure. *Arteriosclerosis, Thrombosis, and Vascular Biology*. 32, 12 (Dec. 2012), 2892–2900. DOI:<https://doi.org/10.1161/ATVBAHA.112.254078>.
- [6] Carneiro-Júnior, M.A. et al. 2014. Effect of exercise training on Ca<sup>2+</sup> release units of left ventricular myocytes of spontaneously hypertensive rats. *Brazilian Journal of Medical and Biological Research = Revista Brasileira De Pesquisas Medicas E Biologicas*. 47, 11 (Nov. 2014), 960–965.
- [7] Erez, A. et al. 2011. Requirement of argininosuccinate lyase for systemic nitric oxide production. *Nature Medicine*. 17, 12 (Nov. 2011), 1619–1626. DOI:<https://doi.org/10.1038/nm.2544>.
- [8] Flister, M.J. et al. 2013. Congenic mapping and sequence analysis of the Renin locus. *Hypertension (Dallas, Tex.: 1979)*. 61, 4 (Apr. 2013), 850–856. DOI:<https://doi.org/10.1161/HYPERTENSIONAHA.111.01008>.
- [9] Gonzaga, N.A. et al. 2020. Treatment with nitrite prevents reactive oxygen species generation in the corpora cavernosa and restores intracavernosal pressure in hypertensive rats. *Nitric Oxide: Biology and Chemistry*. 94, (01 2020), 19–26. DOI:<https://doi.org/10.1016/j.niox.2019.10.006>.
- [10] Guo, Y. et al. 2012. A genome-wide linkage and association scan reveals novel loci for hypertension and blood pressure traits. *PLoS One*. 7, 2 (2012), e31489. DOI:<https://doi.org/10.1371/journal.pone.0031489>.
- [11] Ho, M.-F. et al. 2016. Pharmacology of the Adenosine A3 Receptor in the Vasculature and Essential Hypertension. *PLoS One*. 11, 2 (2016), e0150021. DOI:<https://doi.org/10.1371/journal.pone.0150021>.
- [12] Hoorn, E.J. et al. 2011. The calcineurin inhibitor tacrolimus activates the renal sodium chloride cotransporter to cause hypertension. *Nature Medicine*. 17, 10 (Oct. 2011), 1304–1309. DOI:<https://doi.org/10.1038/nm.2497>.
- [13] Hu, X.-L. et al. 2016. Considerable impacts of AGXT2 V140I polymorphism on chronic heart failure in the Chinese population. *Atherosclerosis*. 251, (2016), 255–262. DOI:<https://doi.org/10.1016/j.atherosclerosis.2016.07.006>.
- [14] Kennedy, C.R. et al. 1999. Salt-sensitive hypertension and reduced fertility in mice lacking the prostaglandin EP2 receptor. *Nature Medicine*. 5, 2 (Feb. 1999), 217–220. DOI:<https://doi.org/10.1038/5583>.
- [15] Kho, J. et al. 2018. Argininosuccinate Lyase Deficiency Causes an Endothelial-Dependent Form of Hypertension. *American Journal of Human Genetics*. 103, 2 (02 2018), 276–287. DOI:<https://doi.org/10.1016/j.ajhg.2018.07.008>.
- [16] Kolz, M. et al. 2009. Association study between variants in the fibrinogen gene cluster, fibrinogen levels and hypertension: results from the MONICA/KORA study. *Thrombosis and Haemostasis*. 101, 2 (Feb. 2009), 317–324.
- [17] Labat, C. et al. 2013. Inflammatory mediators in saliva associated with arterial stiffness and subclinical atherosclerosis. *Journal of Hypertension*. 31, 11 (Nov. 2013), 2251–2258; discussion 2258. DOI:<https://doi.org/10.1097/HJH.0b013e328363dccc>.
- [18] Li, J. et al. 2019. Hydrogen sulfide improves endothelial dysfunction by inhibiting the vicious cycle of NLRP3 inflammasome and oxidative stress in spontaneously hypertensive rats. *Journal of Hypertension*. 37, 8 (2019), 1633–1643. DOI:<https://doi.org/10.1097/HJH.0000000000002101>.
- [19] Li, J. et al. 2019. Loss of reticulocalbin 2 lowers blood pressure and restrains ANG II-induced hypertension in vivo. *American Journal of Physiology. Renal Physiology*. 316, 6 (01 2019), F1141–F1150. DOI:<https://doi.org/10.1152/ajprenal.00567.2018>.
- [20] Lim, J. et al. 2013. Diet-induced obesity, adipose inflammation, and metabolic dysfunction correlating with PAR2 expression are attenuated by PAR2 antagonism. *FASEB journal: official publication of the Federation of American Societies for Experimental Biology*. 27, 12 (Dec. 2013), 4757–4767. DOI:<https://doi.org/10.1096/fj.13-232702>.
- [21] Lloyd, E.E. et al. 2013. Endothelium-dependent relaxations in the aorta from K(2p)6.1 knockout mice. *American Journal of Physiology. Regulatory, Integrative and Comparative Physiology*. 305, 1 (Jul. 2013), R60-67. DOI:<https://doi.org/10.1152/ajpregu.00126.2013>.
- [22] Long, C. et al. 2007. FK506 binding protein 12/12.6 depletion increases endothelial nitric oxide synthase threonine 495 phosphorylation and blood pressure. *Hypertension (Dallas, Tex.: 1979)*. 49, 3 (Mar. 2007), 569–576. DOI:<https://doi.org/10.1161/01.HYP.0000257914.80918.72>.
- [23] Mancini, M. et al. 2013. Mapping genetic determinants of coronary microvascular remodeling in the spontaneously hypertensive rat. *Basic Research in Cardiology*. 108, 1 (Jan. 2013), 316. DOI:<https://doi.org/10.1007/s00395-012-0316-y>.
- [24] Michel, F.S. et al. 2007. Increased spontaneous tone in renal arteries of spontaneously hypertensive rats. *American Journal of Physiology. Heart and Circulatory Physiology*. 293, 3 (Sep. 2007), H1673-1681. DOI:<https://doi.org/10.1152/ajpheart.00289.2007>.

- [25] Ottolini, M. et al. 2020. Local Peroxynitrite Impairs Endothelial Transient Receptor Potential Vanilloid 4 Channels and Elevates Blood Pressure in Obesity. *Circulation*. 141, 16 (Apr. 2020), 1318–1333. DOI:<https://doi.org/10.1161/CIRCULATIONAHA.119.043385>.
- [26] Palatini, P. et al. 2013. Phosducin rs12402521 polymorphism predicts development of hypertension in young subjects with overweight or obesity. *Nutrition, metabolism, and cardiovascular diseases: NMCD*. 23, 4 (Apr. 2013), 323–329. DOI:<https://doi.org/10.1016/j.numecd.2011.08.004>.
- [27] Pandey, P. et al. 2015. ROCK2 and MYLK variants under hypobaric hypoxic environment of high altitude associate with high altitude pulmonary edema and adaptation. *The Application of Clinical Genetics*. 8, (2015), 257–267. DOI:<https://doi.org/10.2147/TACG.S90215>.
- [28] Pandit, L.M. et al. 2014. TWIK-2 channel deficiency leads to pulmonary hypertension through a rho-kinase-mediated process. *Hypertension (Dallas, Tex.: 1979)*. 64, 6 (Dec. 2014), 1260–1265. DOI:<https://doi.org/10.1161/HYPERTENSIONAHA.114.03406>.
- [29] Qvarnstrom, M. et al. 2008. Salivary lysozyme and prevalent hypertension. *Journal of Dental Research*. 87, 5 (May 2008), 480–484. DOI:<https://doi.org/10.1177/154405910808700507>.
- [30] Ratzmann, K.P. et al. 1989. Further evidence for tubular dysfunction in insulin dependent diabetes. *The Journal of Diabetic Complications*. 3, 3 (Sep. 1989), 167–171. DOI:[https://doi.org/10.1016/0891-6632\(89\)90041-x](https://doi.org/10.1016/0891-6632(89)90041-x).
- [31] Rowczenio, D. et al. 2017. Renal Amyloidosis Associated With 5 Novel Variants in the Fibrinogen A Alpha Chain Protein. *Kidney International Reports*. 2, 3 (May 2017), 461–469. DOI:<https://doi.org/10.1016/j.ekir.2016.11.005>.
- [32] Rutkai, I. et al. 2009. Activation of prostaglandin E2 EP1 receptor increases arteriolar tone and blood pressure in mice with type 2 diabetes. *Cardiovascular Research*. 83, 1 (Jul. 2009), 148–154. DOI:<https://doi.org/10.1093/cvr/cvp098>.
- [33] Ryu, Y. et al. 2019. Class I histone deacetylase inhibitor MS-275 attenuates vasoconstriction and inflammation in angiotensin II-induced hypertension. *PLoS One*. 14, 3 (2019), e0213186. DOI:<https://doi.org/10.1371/journal.pone.0213186>.
- [34] Sergeeva, V.A. et al. 2017. [Features of the urine peptidome under the condition of hypertensive pathologies of pregnancy]. *Biomeditsinskaja Khimiia*. 63, 5 (Oct. 2017), 379–384. DOI:<https://doi.org/10.18097/PBMC20176305379>.
- [35] Tavares, I. et al. 2017. Unrecognized Fibrinogen A  $\alpha$ -Chain Amyloidosis: Results From Targeted Genetic Testing. *American Journal of Kidney Diseases: The Official Journal of the National Kidney Foundation*. 70, 2 (Aug. 2017), 235–243. DOI:<https://doi.org/10.1053/j.ajkd.2017.01.048>.
- [36] Tilley, S.L. et al. 1999. Reproductive failure and reduced blood pressure in mice lacking the EP2 prostaglandin E2 receptor. *The Journal of Clinical Investigation*. 103, 11 (Jun. 1999), 1539–1545. DOI:<https://doi.org/10.1172/JCI6579>.
- [37] Turner, S.T. et al. 2008. Genomic association analysis suggests chromosome 12 locus influencing antihypertensive response to thiazide diuretic. *Hypertension (Dallas, Tex.: 1979)*. 52, 2 (Aug. 2008), 359–365. DOI:<https://doi.org/10.1161/HYPERTENSIONAHA.107.104273>.
- [38] Vargas-Alarcón, G. et al. 2014. The (G>A) rs11573191 polymorphism of PLA2G5 gene is associated with premature coronary artery disease in the Mexican Mestizo population: the genetics of atherosclerotic disease Mexican study. *BioMed Research International*. 2014, (2014), 931361. DOI:<https://doi.org/10.1155/2014/931361>.
- [39] Wirth, A. et al. 2008. G12-G13-LARG-mediated signaling in vascular smooth muscle is required for salt-induced hypertension. *Nature Medicine*. 14, 1 (Jan. 2008), 64–68. DOI:<https://doi.org/10.1038/nm1666>.
- [40] Xin, H.-B. et al. 2002. Oestrogen protects FKBP12.6 null mice from cardiac hypertrophy. *Nature*. 416, 6878 (Mar. 2002), 334–338. DOI:<https://doi.org/10.1038/416334a>.
- [41] Xu, H. et al. 2019. VSMC-specific EP4 deletion exacerbates angiotensin II-induced aortic dissection by increasing vascular inflammation and blood pressure. *Proceedings of the National Academy of Sciences of the United States of America*. 116, 17 (23 2019), 8457–8462. DOI:<https://doi.org/10.1073/pnas.1902119116>.
- [42] Yang, C. et al. 2014. Vasodilatory effect of 14,15-epoxyeicosatrienoic acid on mesenteric arteries in hypertensive and aged rats. *Prostaglandins & Other Lipid Mediators*. 112, (Aug. 2014), 1–8. DOI:<https://doi.org/10.1016/j.prostaglandins.2014.05.001>.
- [43] Yang, D.-L. et al. 2009. Galphaq-protein carboxyl terminus imitation polypeptide (GCIP)-27 inhibits right ventricular hypertrophy induced by monocrotaline in rats. *Biological & Pharmaceutical Bulletin*. 32, 3 (Mar. 2009), 376–381. DOI:<https://doi.org/10.1248/bpb.32.376>.
- [44] Yang, T. et al. 2016. Genetic Abrogation of Adenosine A3 Receptor Prevents Uninephrectomy and High Salt-Induced Hypertension. *Journal of the American Heart Association*. 5, 7 (18 2016). DOI:<https://doi.org/10.1161/JAHA.116.003868>.
